# Supplementary material for: Five-state molecular switching of a [3]rotaxane in response to weak and strong acid and base stimuli
Source: Royal Society of Chemistry journal article supplement (doi:10.1039/c3cc47343k), 2013-01-01
Supplement: c3cc47343k.pdf [file c3cc47343k.pdf]

## Supplementary Information

### Five-State Molecular Switching of a [3]Rotaxane in Response to Weak and Strong Acid and Base Stimuli

Yuji Tokunaga,\* Syuji Ikezaki, Masaki Kimura, Kenji Hisada,\* Tsuneomi Kawasaki

*Department of Materials Science and Engineering, Faculty of Engineering, University of Fukui, Bunkyo, Fukui 910-8507, Japan*

*Fiber Amenity Engineering, Faculty of Engineering, University of Fukui, Bunkyo, Fukui 910-8507, Japan*

1. Experimental
2. **Figure S1.**  $^1\text{H}$  NMR spectra of the [3]rotaxane **1-H<sub>2</sub>** in the presence of various amounts of AcOH after an addition of  $^t\text{BuOK}$ .
3. **Figure S2.**  $^1\text{H}$  NMR spectra of the [3]rotaxane **1-H<sub>2</sub>** after sequential additions of  $\text{Bu}_4\text{NOH}$  as a base and AcOH as an acid.
4. **Figure S3.**  $^1\text{H}$  NMR spectra of the [3]rotaxane **1-H<sub>2</sub>** in the presence of TfOH (0–6 eq).
5. **Figure S4.** UV spectra of the [3]rotaxane **1-H<sub>2</sub>** in the presence of TfOH.
6. **Figure S5.** UV spectra of the [3]rotaxane **1-H<sub>2</sub>** in the presence of  $\text{Et}_3\text{N}$  after the addition of TfOH.
7. **Figure S6.** Plots of UV spectra of the [3]rotaxane **1-H<sub>2</sub>** after sequential additions of TfOH and  $\text{Et}_3\text{N}$ .
8. **Figure S7.** UV spectra of the [3]rotaxane **1-H<sub>2</sub>** in the presence of  $\text{Et}_3\text{N}$  and TfOH after sequential additions of  $\text{Bu}_4\text{NOH}$  and AcOH (NMR experiments).
9. **Figure S8.** UV spectra of **states 3, 4, and 5** determined through target factor analysis
10. **Figure S9.** COSY and NOESY spectra of the [3]rotaxane **1-H<sub>2</sub>**.
11. **Figure S10.** COSY and NOESY spectra of the [3]rotaxane **1-H<sub>2</sub>** in the presence of  $^t\text{BuOK}$ .
12. **Figure S11.** COSY and NOESY spectra of the [3]rotaxane **1-H<sub>2</sub>** in the presence of TfOH.
13. **Figure S12.**  $^1\text{H}$  and  $^{13}\text{C}$  NMR spectra of the carbazole **2a**.
14. **Figure S13.**  $^1\text{H}$  and  $^{13}\text{C}$  NMR spectra of the carbazole **2b**.

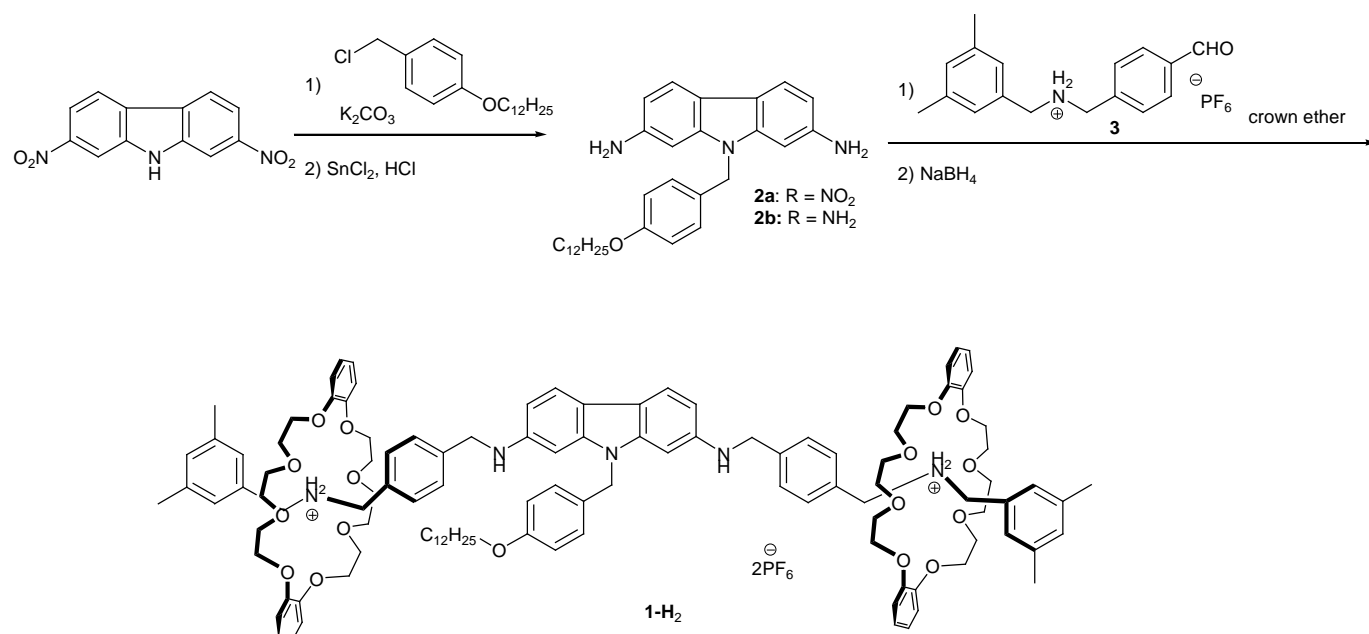

## Experimental

### General methods

Infrared spectra were recorded using a Shimadzu FTIR-8600PC instrument. <sup>1</sup>H NMR spectra were recorded using JEOL LA-500 spectrometers, with TMS as the internal standard. Mass spectra were recorded using a JMS-700T instrument. UV spectra were recorded using a HITACHI U-3900H spectrometer. All reactions were performed under a positive atmosphere of dry N<sub>2</sub>. All extracts were dried over MgSO<sub>4</sub>; solvents were removed through rotary evaporation under reduced pressure. Silica gel column chromatography was performed using Kanto Chemical silica gel 60N. Thin-layer chromatography was performed using Merck Kieselgel 60PF<sub>254</sub>.

**9-(4-Dodecanoxybenzyl)-2,7-dinitrocarbazole (2a).** A suspension of the dinitrocarbazole **1** (275 mg, 1.00 mmol), 4-dodecanoxybenzyl chloride (342 mg, 1.10 mmol), and K<sub>2</sub>CO<sub>3</sub> (276 mg, 2.00 mmol) in DMF (2.5 mL) was stirred at 70 °C for 24 h. Water (20 mL) was added to the reaction mixture and then the solid was filtered off and washed with H<sub>2</sub>O and MeOH to afford **2a** as a yellow solid (493 mg, 93%). IR (KBr)  $\nu_{\text{max}}$  (cm<sup>-1</sup>) 2916, 2848, 1611, 1519, 1469, 1339, 1253, 1175, 1037, 822. <sup>1</sup>H NMR (500 MHz, DMSO-*d*<sub>6</sub>, 90 °C)  $\delta$  8.61 (d, *J* = 2.1 Hz, 2H), 8.55 (d, *J* = 8.6 Hz, 2H), 8.13 (dd, *J* = 8.6, 2.1 Hz, 2H), 7.18–7.13 (m, 2H), 6.81–6.86 (m, 2H), 5.86 (s, 2H), 3.89 (t, *J* = 6.8 Hz, 3H), 1.64 (quint, *J* = 6.8 Hz, 2H), 1.39–1.13 (m, 18H), 0.84 (t, *J* = 6.9 Hz, 3H). <sup>13</sup>C NMR (125 MHz, DMSO-*d*<sub>6</sub>, 90 °C)  $\delta$  158.0, 146.8, 141.1, 127.9, 127.6, 125.4, 122.2, 114.6, 114.4, 105.9, 67.3, 45.6, 30.7, 28.36, 28.35, 28.31, 28.14, 28.10, 28.0, 24.9, 21.4, 13.2 HR-MS (FAB): calcd for [M]<sup>+</sup> C<sub>31</sub>H<sub>37</sub>N<sub>3</sub>O<sub>5</sub>, *m/z* 531.2733; found, *m/z* 531.2753.

**2,7-Diamino-9-(4-dodecanoxybenzyl)carbazole (2b).** A solution of the dinitrocarbazole **2a** (566 mg, 1.06 mmol) and  $\text{SnCl}_2 \cdot \text{H}_2\text{O}$  (2.40 g, 10.6 mmol) in EtOH (20 mL) was heated under reflux for 24 h. After evaporation of the organic solvent, 10% NaOH (aq) was added to the residue and the mixture extracted with  $\text{CH}_2\text{Cl}_2$ . The combined extracts were washed with sat. NaCl, dried, and evaporated to give a residue, which was chromatographed (toluene:Et<sub>2</sub>O, 3:1) to give a crude product, washing of which with MeOH afforded the **2b** (329 mg, 66%). IR (KBr)  $\nu_{\text{max}}$  (cm<sup>-1</sup>) 3454, 3372, 2913, 2847, 1617, 1510, 1489, 1274, 1242, 1176, 1136, 1045, 812. <sup>1</sup>H NMR (500 MHz, CDCl<sub>3</sub>)  $\delta$  7.70 (d,  $J$  = 7.9 Hz, 2H), 7.08–7.03 (m, 2H), 6.81–6.75 (m, 2H), 6.59–6.53 (m, 4H), 5.23 (s, 2H), 3.88 (t,  $J$  = 6.8 Hz, 2H), 3.71 (br s, 4H), 1.73 (quint,  $J$  = 6.8 Hz, 2H), 1.45–1.20 (m, 18H), 0.87 (t,  $J$  = 7.0 Hz, 3H). <sup>13</sup>C NMR (125 MHz, CDCl<sub>3</sub>, 35 °C)  $\delta$  158.5, 144.1, 142.2, 129.1, 127.5, 119.9, 116.4, 114.8, 108.5, 94.9, 68.1, 45.9, 31.9, 29.64, 29.61, 29.58, 29.56, 29.4, 29.3, 26.0, 22.7, 14.1. HR-MS (FAB): calcd for  $[\text{M}]^+$  C<sub>31</sub>H<sub>41</sub>N<sub>3</sub>O,  $m/z$  471.3250; found,  $m/z$  471.3247.

**[3]Rotaxane 1-H<sub>2</sub>.** A suspension of the ammonium salt **3**<sup>2</sup> (212 mg, 0.53 mmol), DB24C8 (285 mg, 0.64 mmol), and the carbazole **2b** (100 mg, 0.21 mmol) in  $\text{CH}_2\text{ClCH}_2\text{Cl}$  (3 mL) was heated at 70 °C for 24 h. After cooling to room temperature, NaBH<sub>4</sub> (80 mg, 2.10 mmol) and EtOH (3 mL) were added and then the mixture was stirred at room temperature for 24 h. The excess NaBH<sub>4</sub> was quenched with dil. HCl (aq.) and then the organic solvent was evaporated off. The resulting mixture was treated with dil. NaHCO<sub>3</sub> (aq.) and extracted with  $\text{CH}_2\text{Cl}_2$ . The combined extracts were washed with water, dried, and evaporated to give a residue, which was chromatographed ( $\text{CH}_2\text{Cl}_2$ : THF, 10:1) to afford the crude product. A suspension of the crude product in acetone (8 mL) and H<sub>2</sub>O (8 mL) was treated with NH<sub>4</sub>PF<sub>6</sub> (680 mg, 4.17 mmol), and stirred for 2 h. After the organic solvent had been evaporated, the resulting solid was washed with H<sub>2</sub>O, <sup>i</sup>PrOH, and Et<sub>2</sub>O to give a solid (258 mg, 57%). IR (KBr)  $\nu_{\text{max}}$  (cm<sup>-1</sup>) 3153, 3065, 2925, 1612, 1505, 1455, 1252, 1211, 1056, 954, 842, 743, 557. <sup>1</sup>H NMR (500 MHz, CD<sub>3</sub>CN)  $\delta$  7.54 (d,  $J$  = 8.2 Hz, 2H), 7.32–7.24 (m, 4H), 7.23–7.15 (m, 4H), 6.99–6.93 (m, 2H), 6.86–6.70 (m, 24H), 6.50 (d,  $J$  = 1.8 Hz, 2H), 6.42 (dd,  $J$  = 8.2 and 1.8 Hz, 2H), 5.09 (s, 2H), 4.93–4.84 (m, 2H), 4.62–4.48 (m, 4H), 4.23 (d,  $J$  = 4.6 Hz, 2H), 4.03–3.91 (m, 16H), 3.84 (t,  $J$  = 7.2 Hz, 2H), 3.72–3.60 (m, 16H), 3.48–3.40 (m, 16H), 2.05 (s, 12H), 1.64 (quint,  $J$  = 7.2 Hz, 2H), 1.40–1.18 (m, 18H), 0.86 (t,  $J$  = 7.2 Hz, 3H). <sup>13</sup>C NMR (125 MHz, CD<sub>3</sub>CN, 30 °C)  $\delta$  159.4, 148.5, 142.9, 142.7, 139.2, 133.0, 131.5, 131.1, 130.9, 130.7, 129.1, 128.7, 127.8, 126.4, 122.2, 120.3, 118.3, 115.9, 115.5, 113.5, 108.1, 71.6, 71.1, 69.0, 68.9, 53.4, 53.2, 48.3, 46.2, 32.6, 30.7, 30.35, 30.30, 30.13, 30.07, 29.97, 26.7, 23.4, 21.2, 14.4. HR-MS (FAB): calcd for  $[\text{3-H}_2\text{-PF}_6]^+$  C<sub>113</sub>H<sub>145</sub>F<sub>6</sub>N<sub>5</sub>O<sub>17</sub>P,  $m/z$  1989.0272; found,  $m/z$  1989.0314.

## References

1. P. A. S. Smith and B. B. Brown, *J. Am. Chem. Soc.*, 1951, **73**, 2435–2437.
2. Y. Tokunaga, M. Kawabata, Y. Yamauchi and N. Harada, *Heterocycles*, 2010, **81**, 67–72.

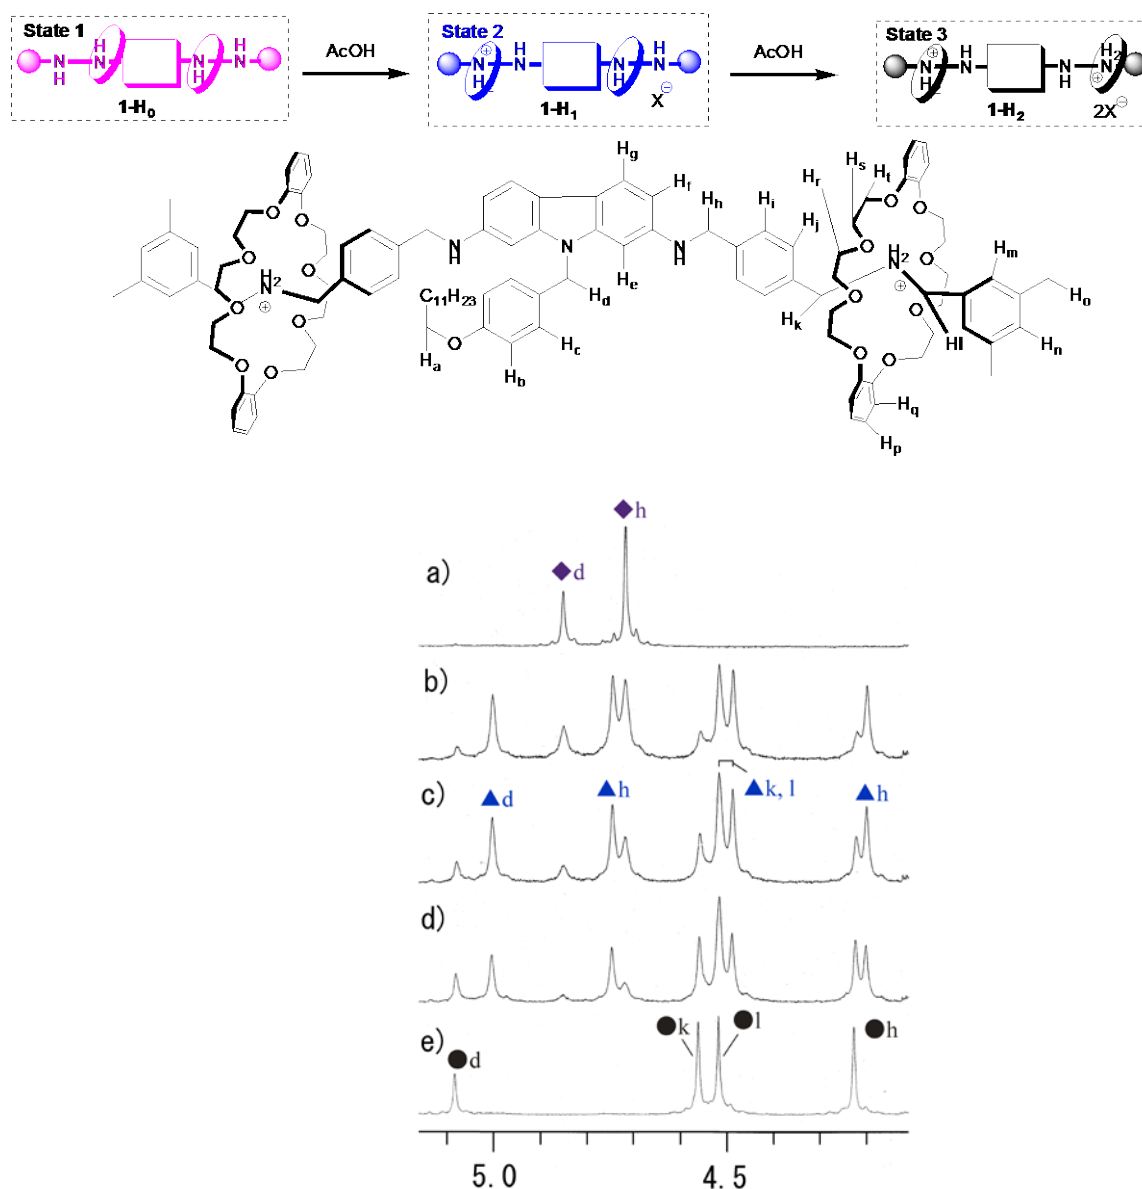

**Fig. S1.** Detailed view of the conversion of **1-H<sub>0</sub>** to **1-H<sub>2</sub>** through the addition of various amounts of AcOH (from state 1 to state 3, as defined in Scheme 2). Partial <sup>1</sup>H NMR spectra (500 MHz; CD<sub>3</sub>CN/CD<sub>3</sub>OD, 10:1) of (a) the [3]rotaxane **1-H<sub>2</sub>** and <sup>t</sup>BuOK (2.5 eq) and (b–e) the sample in (a) after the addition of (b) 1.1, (c) 1.5, (d) 1.7, and (e) 2.6 eq of AcOH. ◆: **1-H<sub>0</sub>**; ▲: **1-H<sub>1</sub>**; ●: **1-H<sub>2</sub>**.

For atom labels, see Fig. 2.

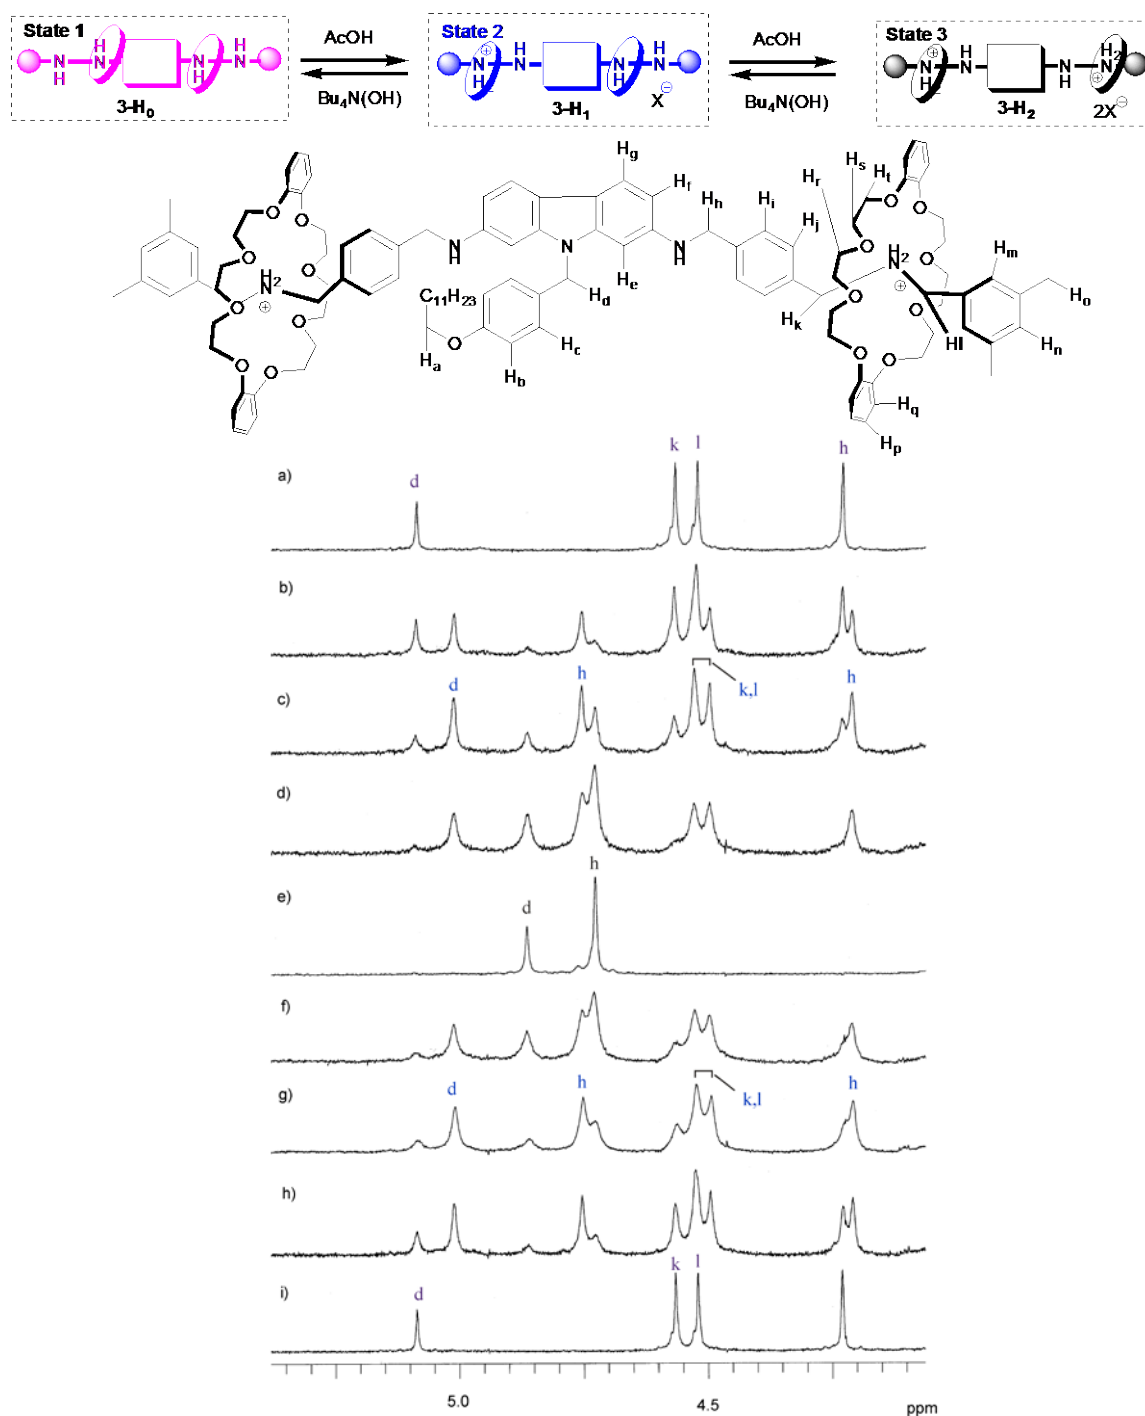

**Fig. S2.** Partial  $^1\text{H}$  NMR spectra (500 MHz;  $\text{CD}_3\text{CN}/\text{CD}_3\text{OD}$ , 10:1) of the [3]rotaxane **1-H<sub>2</sub>** after sequential additions of  $\text{Bu}_4\text{NOH}$  as a base and acetic acid as an acid. (a) [3]rotaxane **1-H<sub>2</sub>**; (b–e) the sample in (a) after the addition of (b) 0.5, (c) 1.0, (d) 1.5, and (e) 2.1 eq of  $\text{Bu}_4\text{NOH}$  in  $\text{MeOH}$ ; (f–i) the sample in (e) after the addition of (f) 0.6, (g) 1.1, (h) 1.6, and (i) 2.2 eq of  $\text{AcOH}$ .

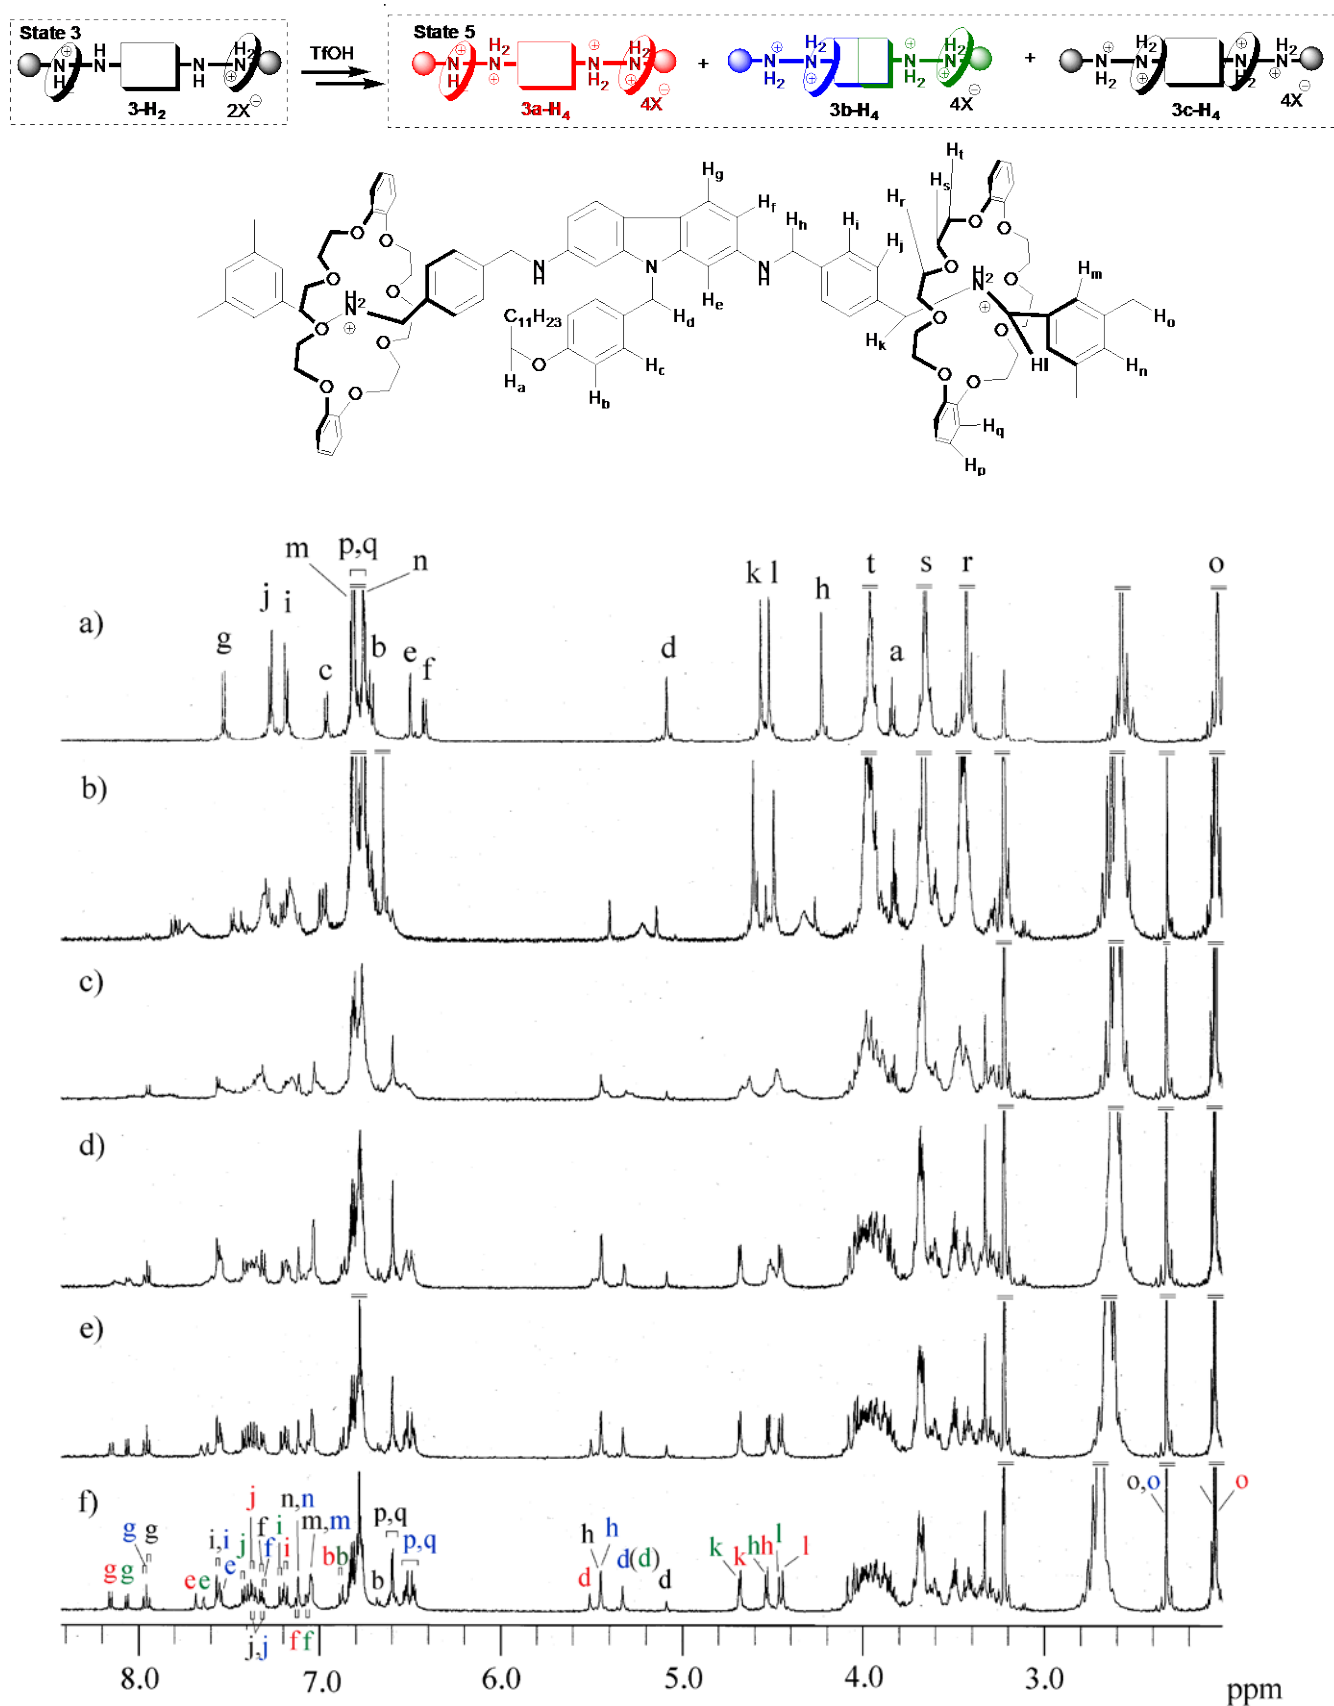

**Fig. S3.** <sup>1</sup>H NMR spectra (500 MHz; CD<sub>3</sub>CN/CD<sub>3</sub>OD, 10:1) of the [3]rotaxane **1-H<sub>2</sub>** (1.5 mM) in the presence of (a) 0, (b) 1, (c) 2, (d) 3, (e) 4, and (f) 6 eq of TfOH.

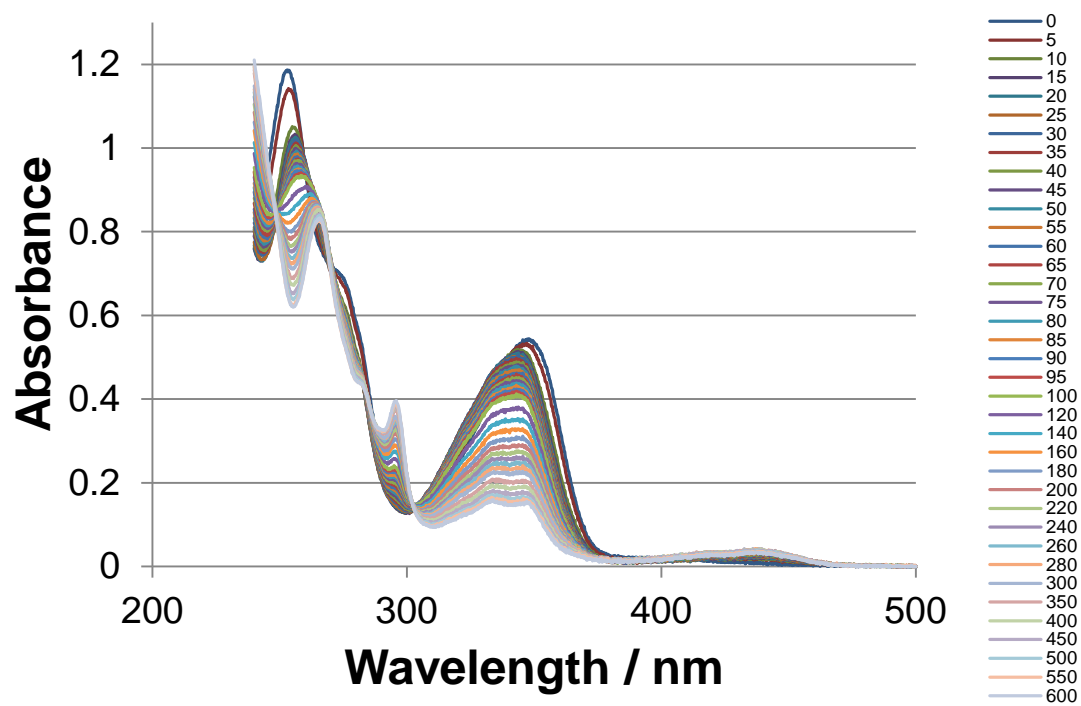

**Fig. S4.** UV spectra of the [3]rotaxane **1-H<sub>2</sub>** [20 μM in CH<sub>3</sub>CN/CH<sub>3</sub>OH (1:1)] in the presence of TfOH (0–600 eq).

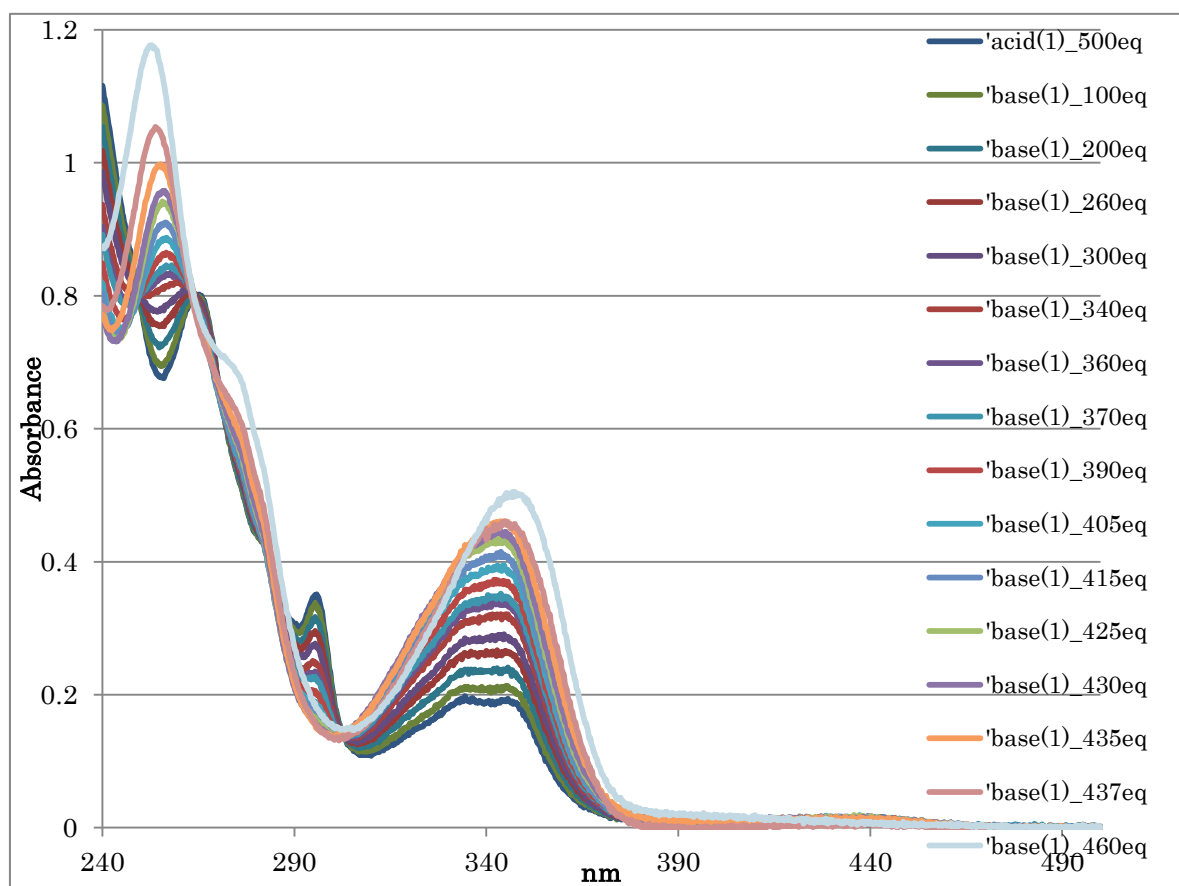

**Fig. S5.** UV spectra of the [3]rotaxane **1-H<sub>2</sub>** in the presence of Et<sub>3</sub>N (0–460 eq) after the addition of TfOH (500 eq).



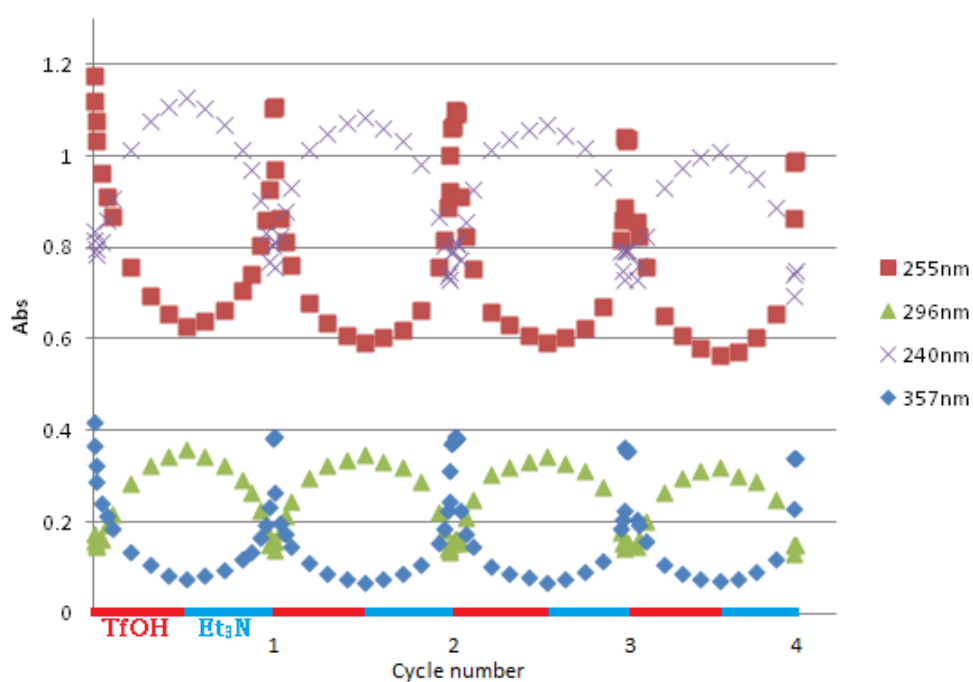

**Fig. S6.** Plots of the UV spectral data of the [3]rotaxane **1-H<sub>2</sub>** after sequential additions of acid (TfOH) and base (Et<sub>3</sub>N).

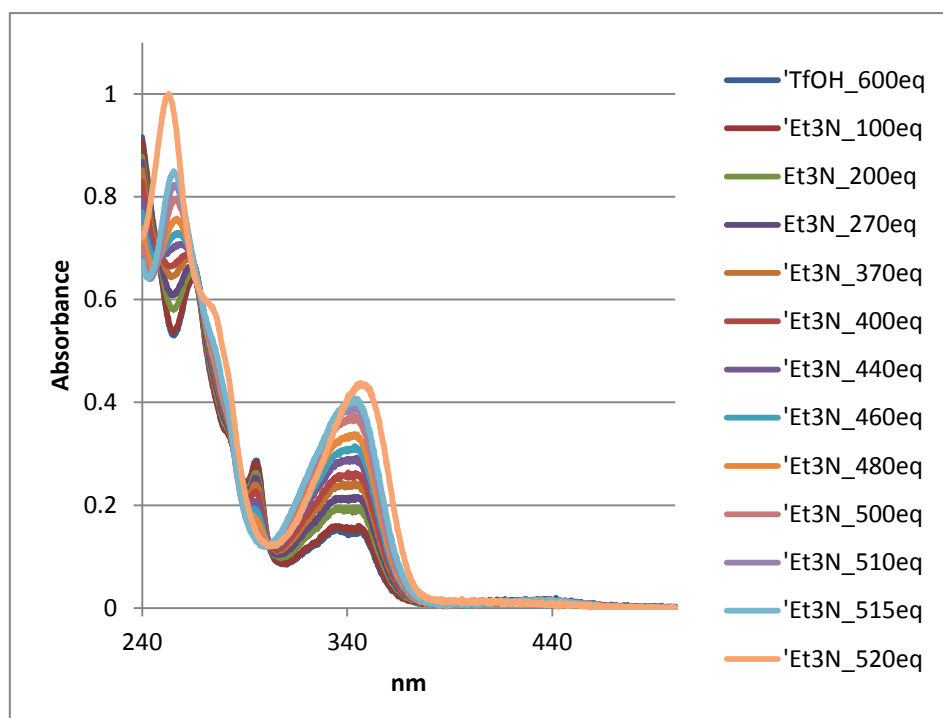

**Fig. S7.** UV spectra of the [3]rotaxane **1-H<sub>2</sub>** in the presence of Et<sub>3</sub>N and TfOH after sequential additions of Bu<sub>4</sub>NOH and AcOH (NMR experiments).

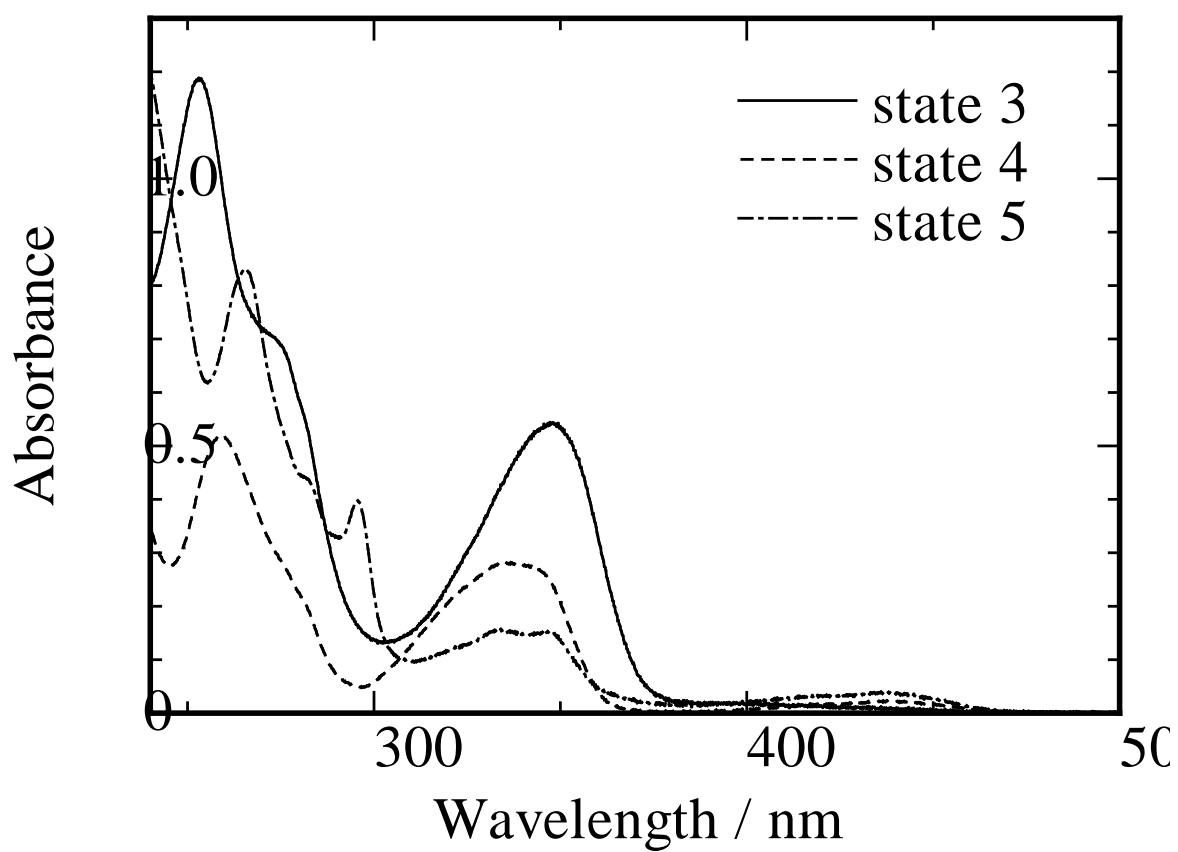

**Fig. S8a.** UV spectra of **states 3, 4, and 5** determined through target factor analysis.

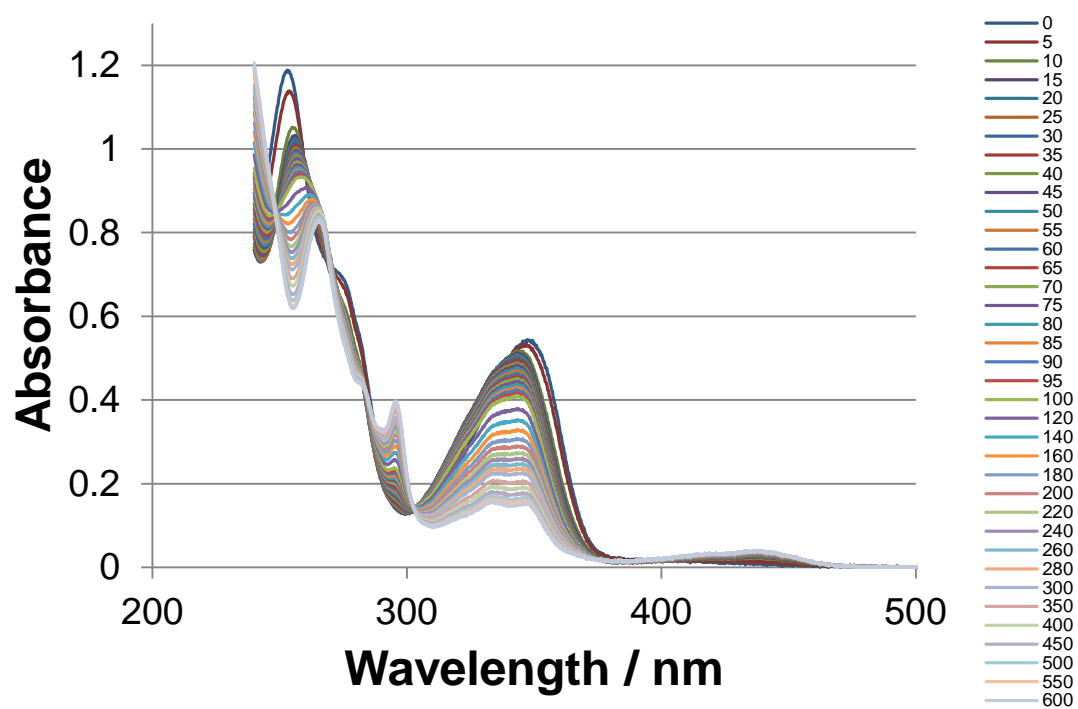

**Fig. S8b.** UV spectra of the [3]rotaxane **1-H<sub>2</sub>** in the presence of TfOH (0–600 eq), calculated using target factor analysis.

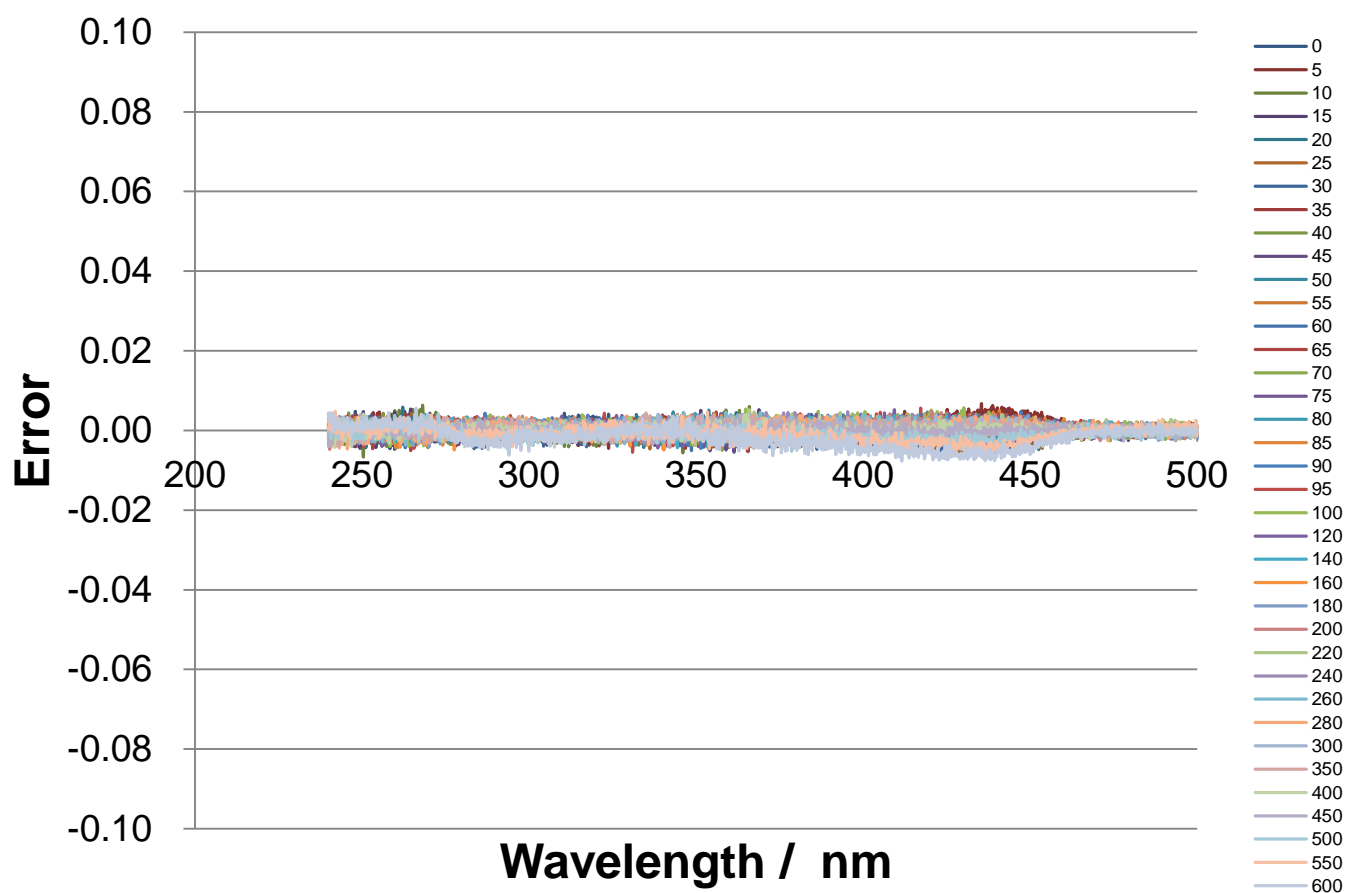

**Fig. S8c.** Errors between experimental and calculated UV data (differences between Fig. S4 and S8b).

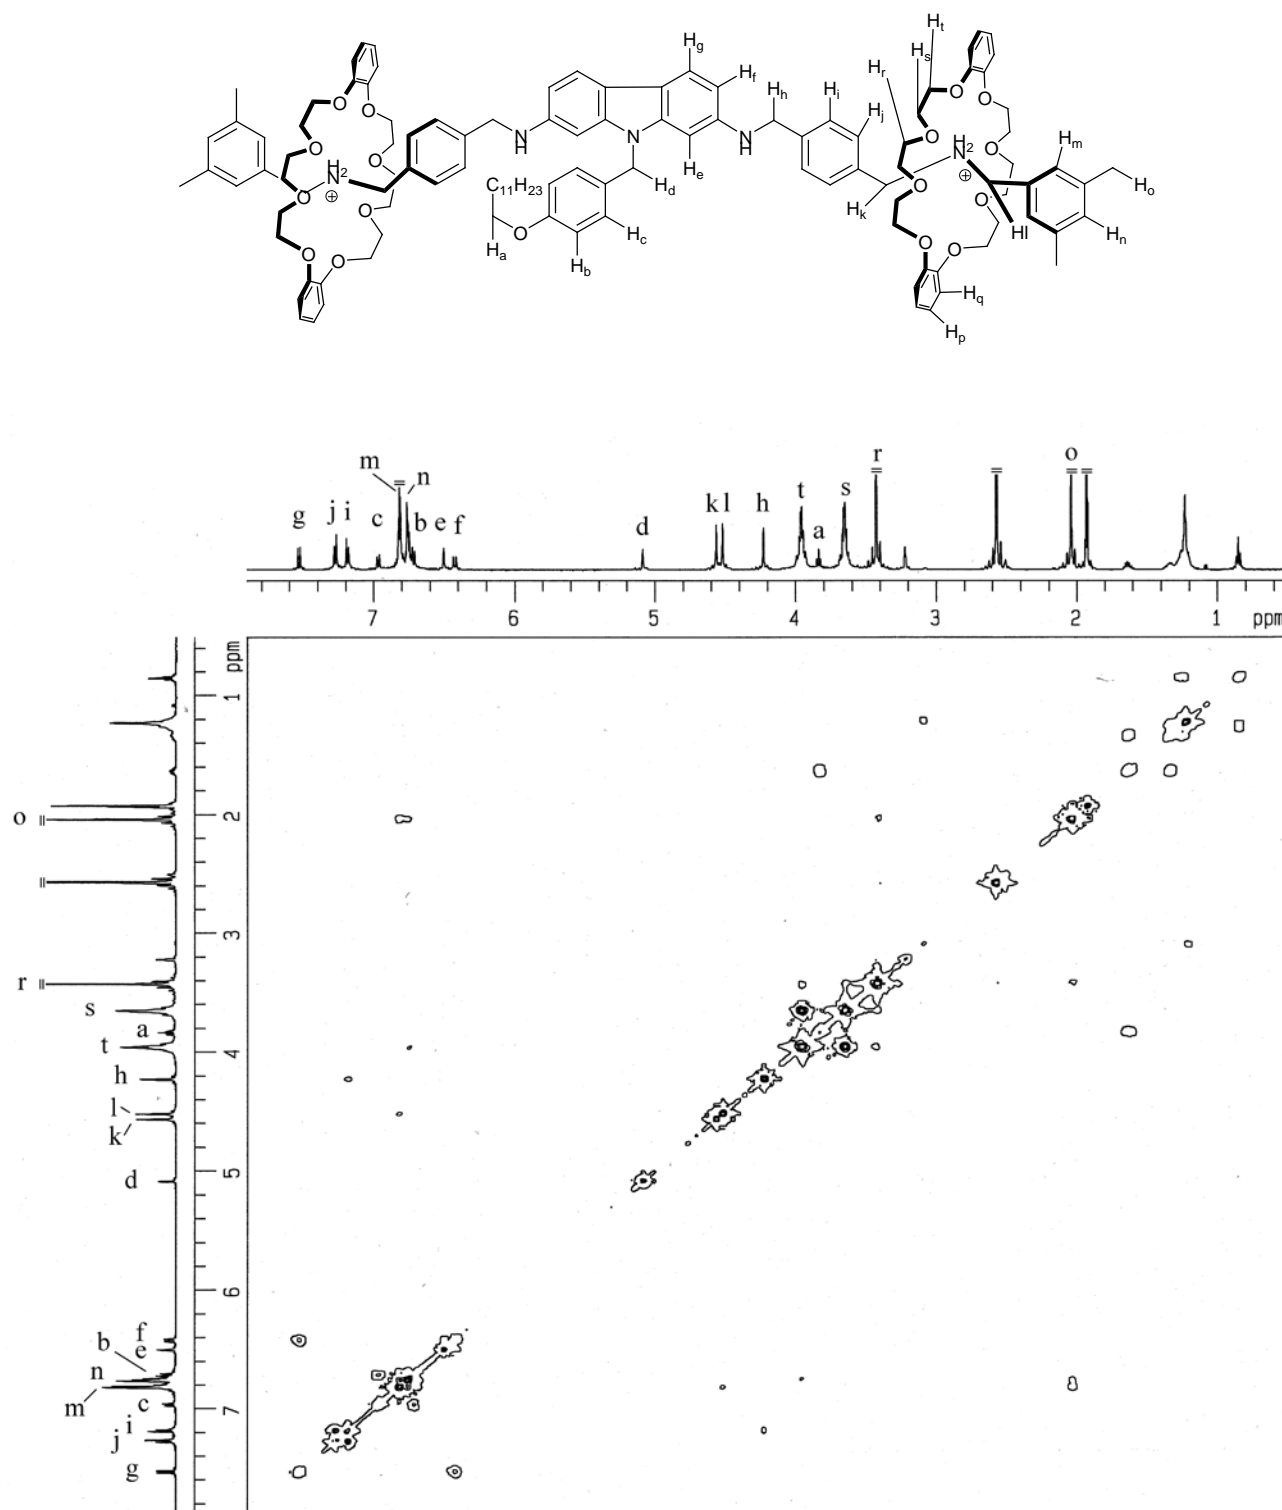

**Fig. S9a.** COSY spectrum (500 MHz; CD<sub>3</sub>CN/CD<sub>3</sub>OD, 10:1; 4.2 mM) of the [3]rotaxane **1-H<sub>2</sub>**.

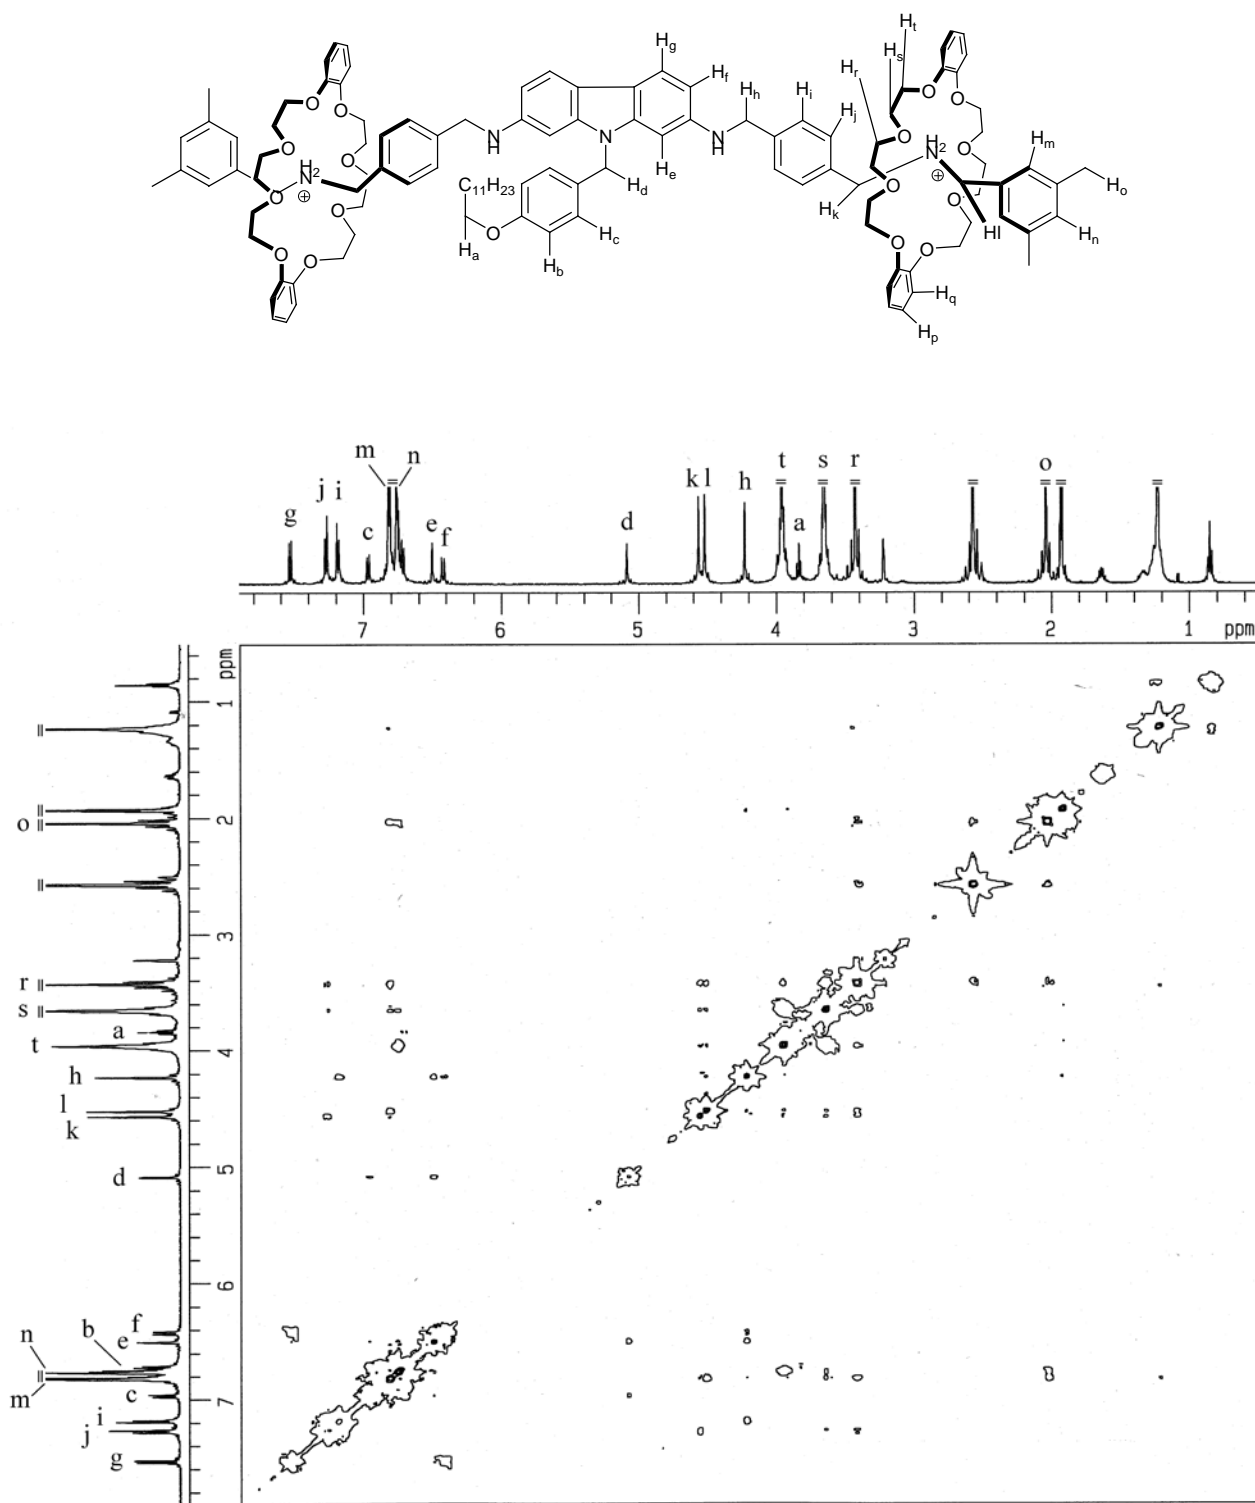

**Fig. S9b.** NOESY spectrum (500 MHz; CD<sub>3</sub>CN/CD<sub>3</sub>OD, 10:1; 4.2 mM) of the [3]rotaxane **1-H<sub>2</sub>**.

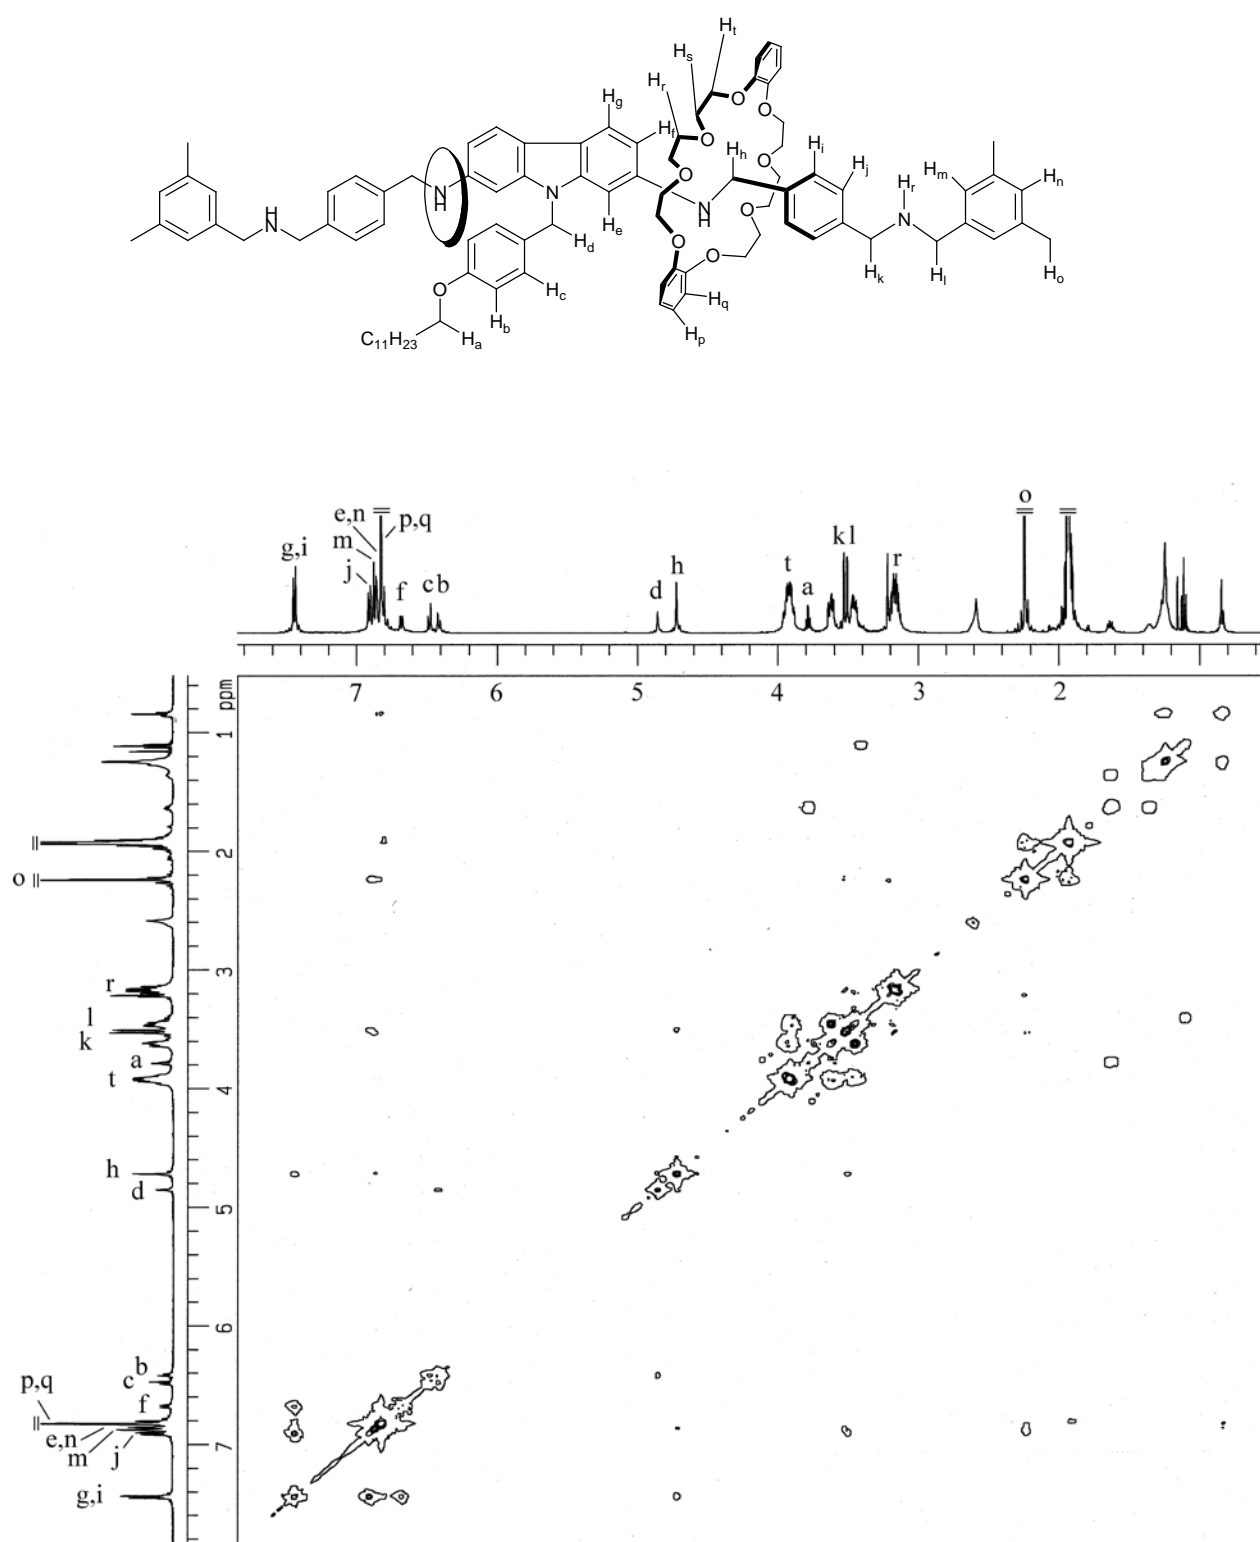

**Fig. S10a.** COSY spectrum (500 MHz; CD<sub>3</sub>CN-CD<sub>3</sub>OD, 10:1; 4.2 mM) of the [3]rotaxane **1-H<sub>2</sub>** in the presence of <sup>*t*</sup>BuOK (2.1 eq).



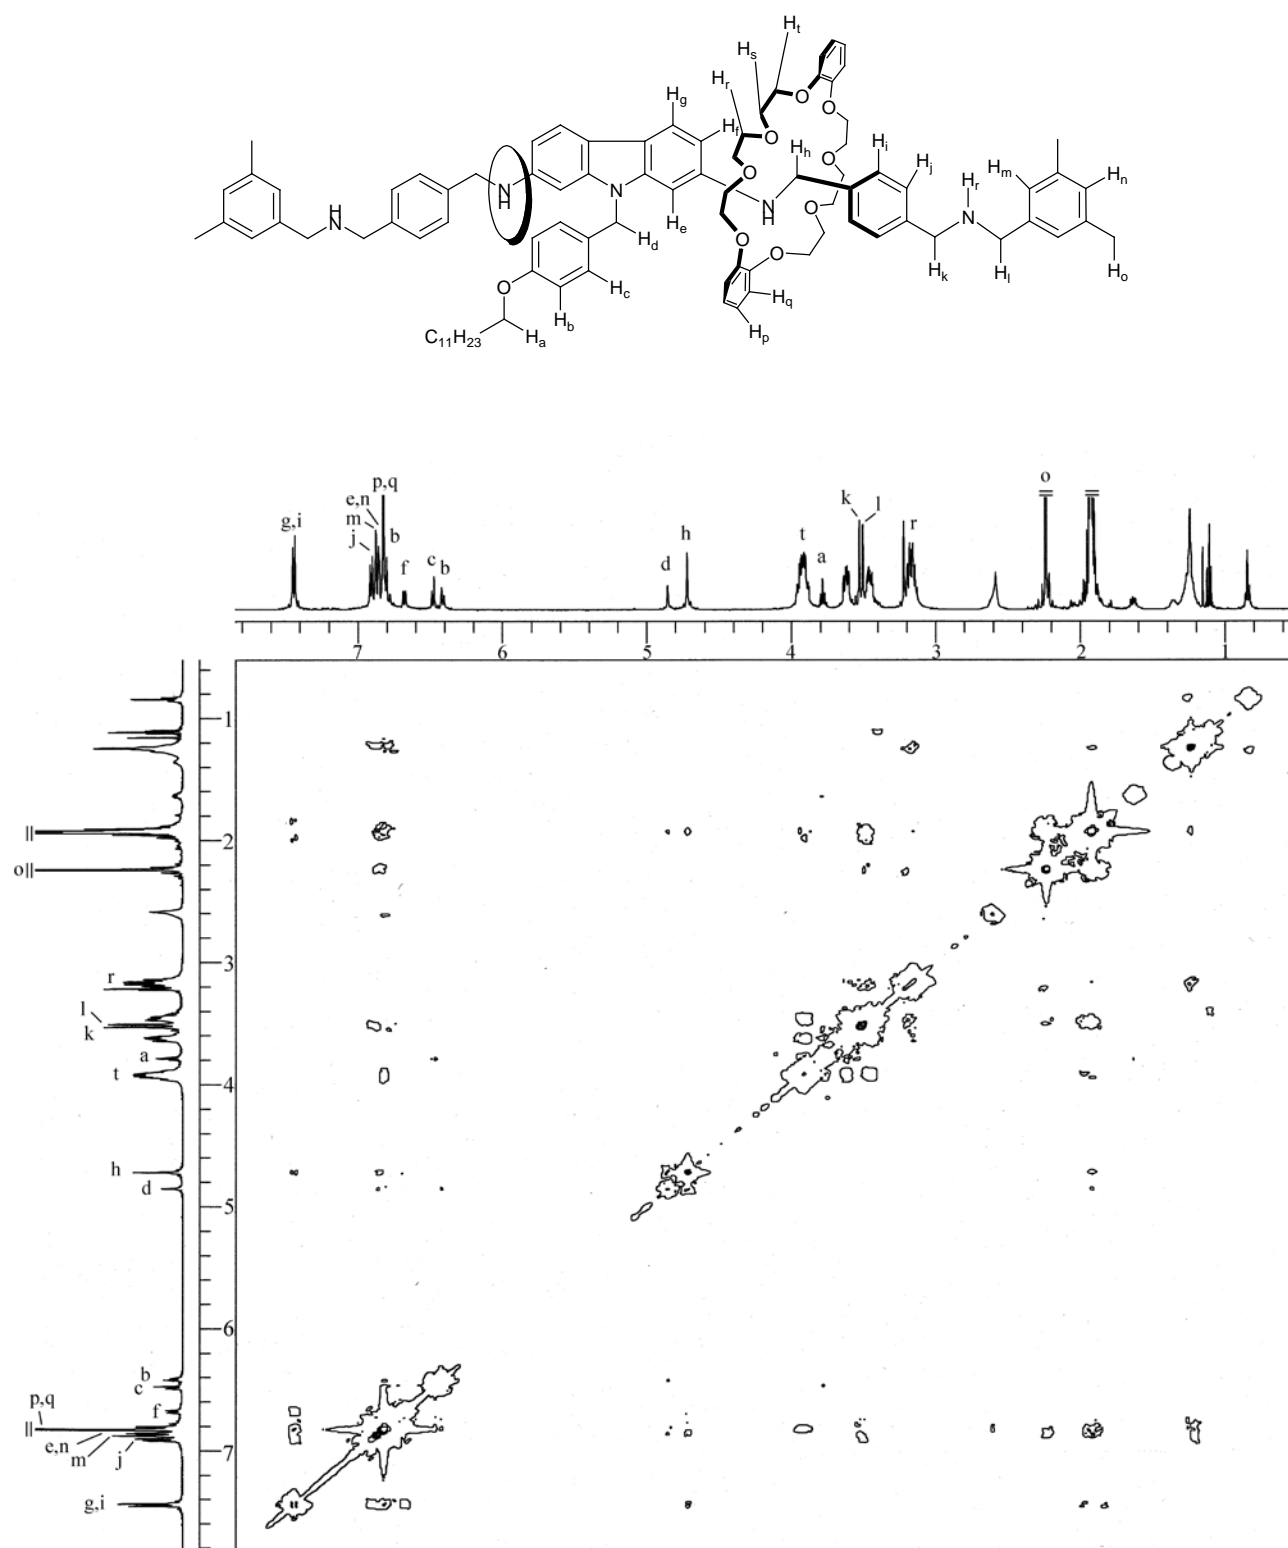

**Fig. S10b.** NOESY spectrum (500 MHz; CD<sub>3</sub>CN/CD<sub>3</sub>OD, 10:1; 4.2 mM) of the [3]rotaxane **1-H<sub>2</sub>** in the presence of <sup>t</sup>BuOK (2.1 eq).

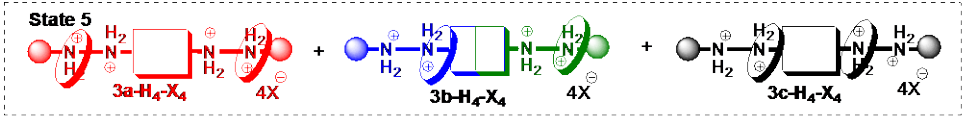

**Fig. S11a.** COSY spectrum (500 MHz; CD<sub>3</sub>CN-CD<sub>3</sub>OD, 10:1; 6.1 mM) of the [3]rotaxane **1-H<sub>2</sub>** in the presence of TfOH (5 eq).

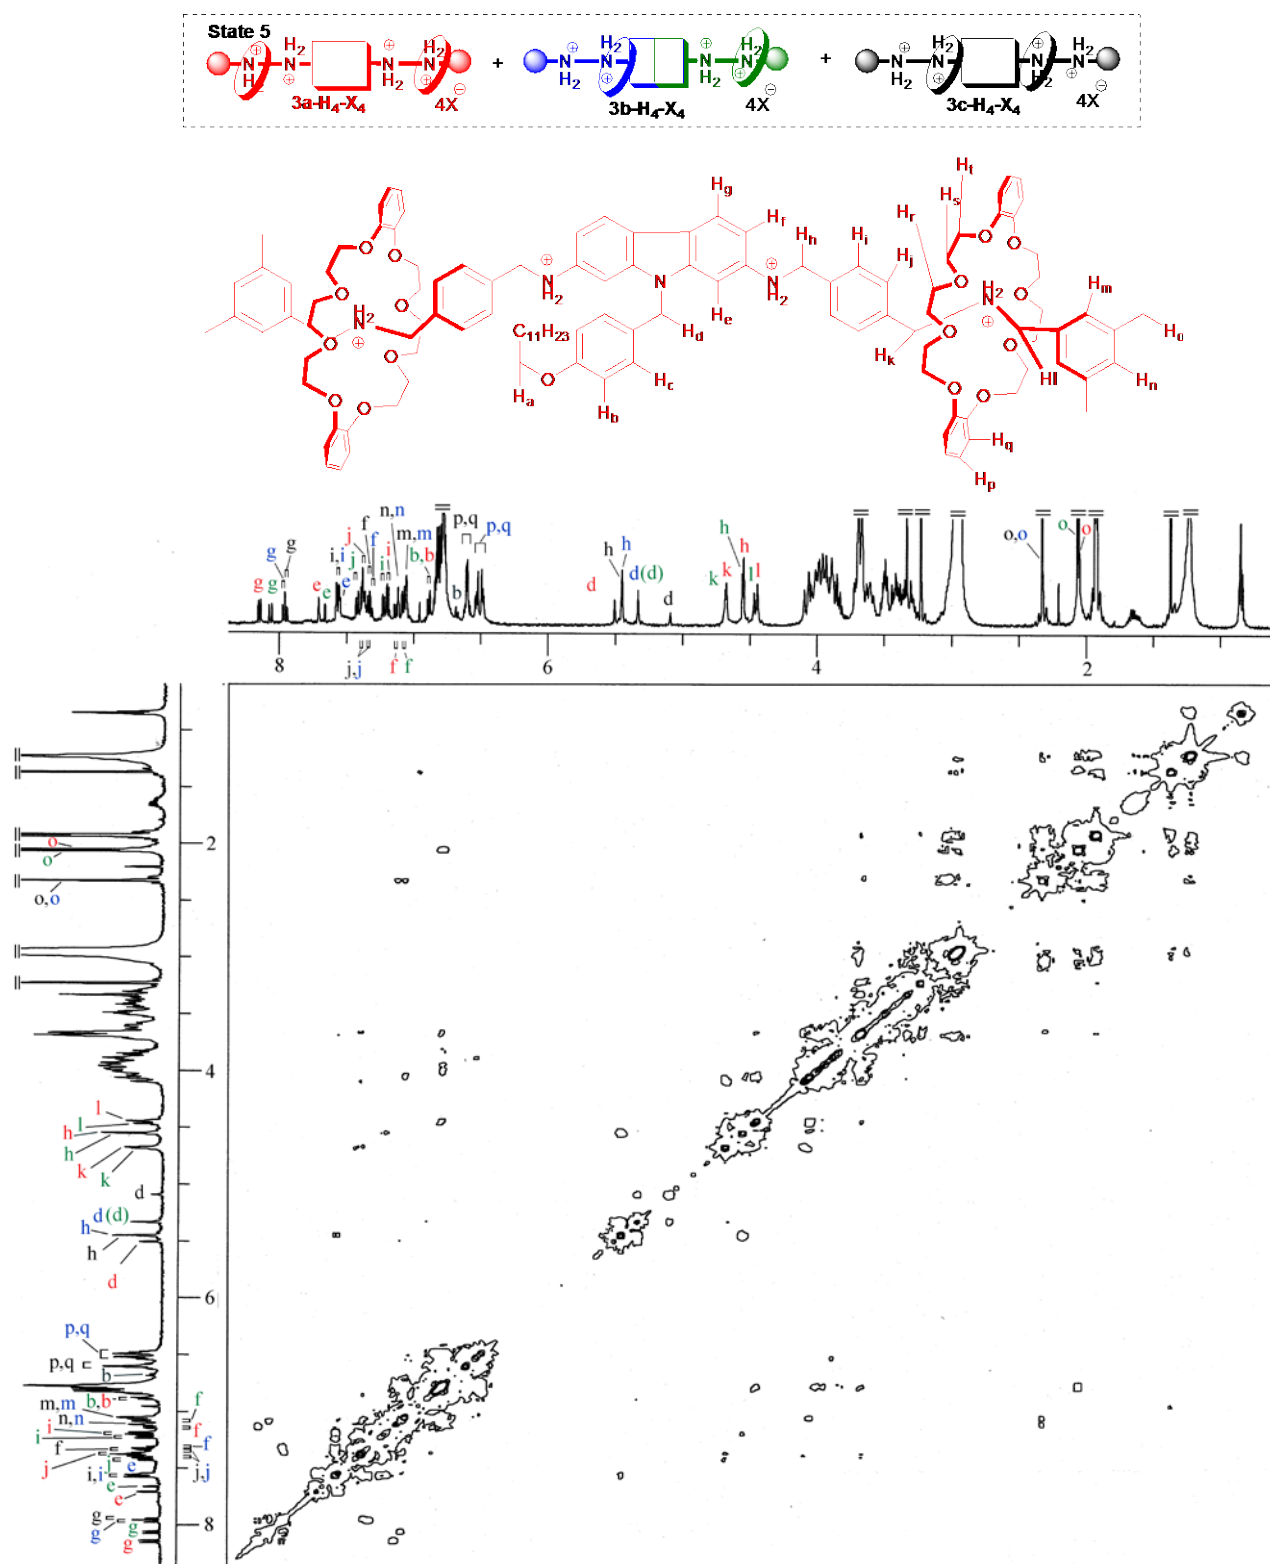

**Fig. S11b.** NOESY spectrum (500 MHz; CD<sub>3</sub>CN/CD<sub>3</sub>OD, 10:1; 6.1 mM) of the [3]rotaxanes **1-H<sub>2</sub>** in the presence of TfOH (5 eq).

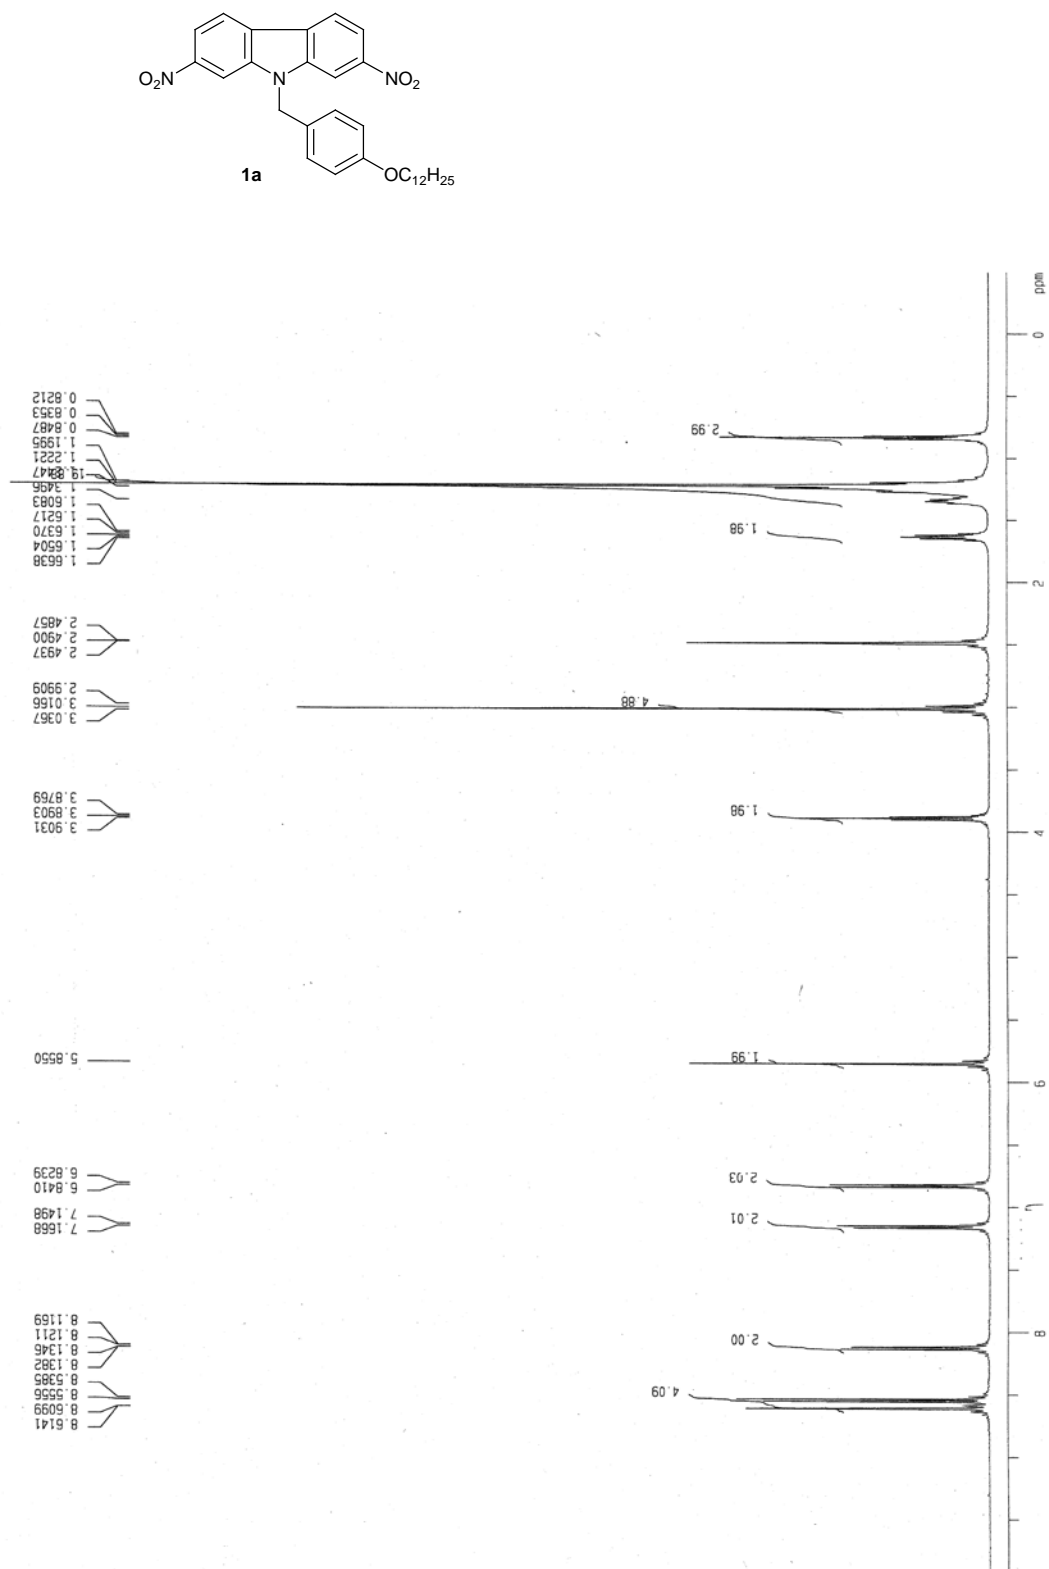

**Fig. S12a.** <sup>1</sup>H NMR spectrum (500 MHz, DMSO-*d*<sub>6</sub>) of the carbazole **2a**.

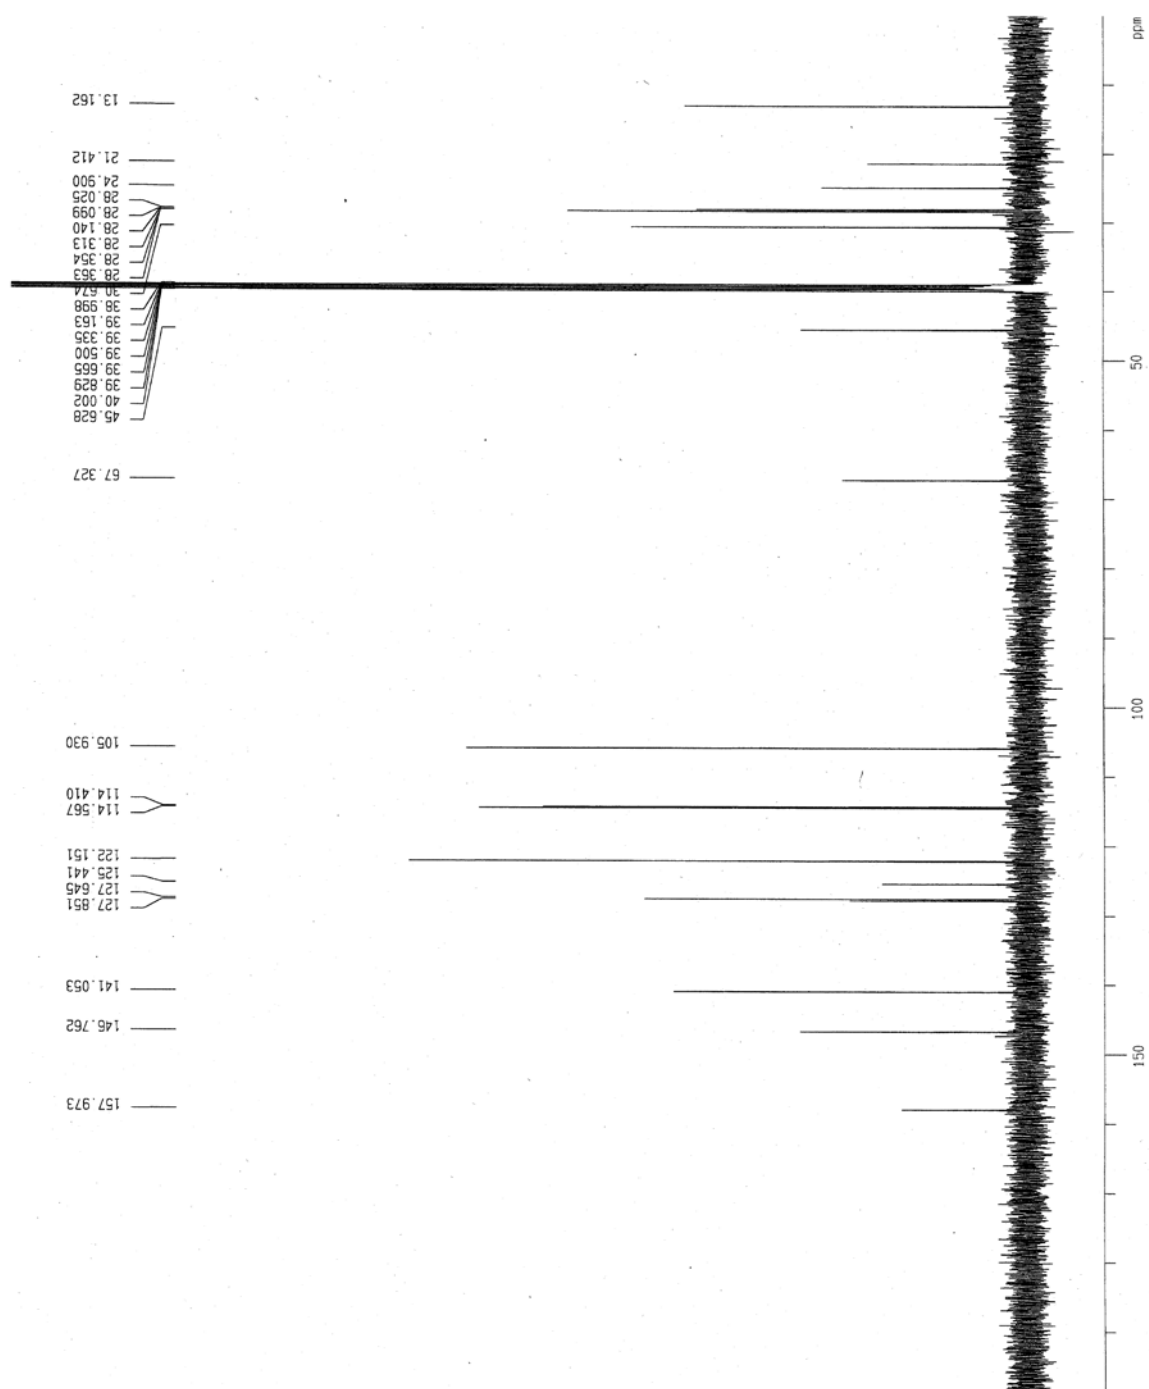

**Fig. S12b.** <sup>13</sup>C NMR spectrum (500 MHz, DMSO-*d*<sub>6</sub>) of the carbazole **2a**.

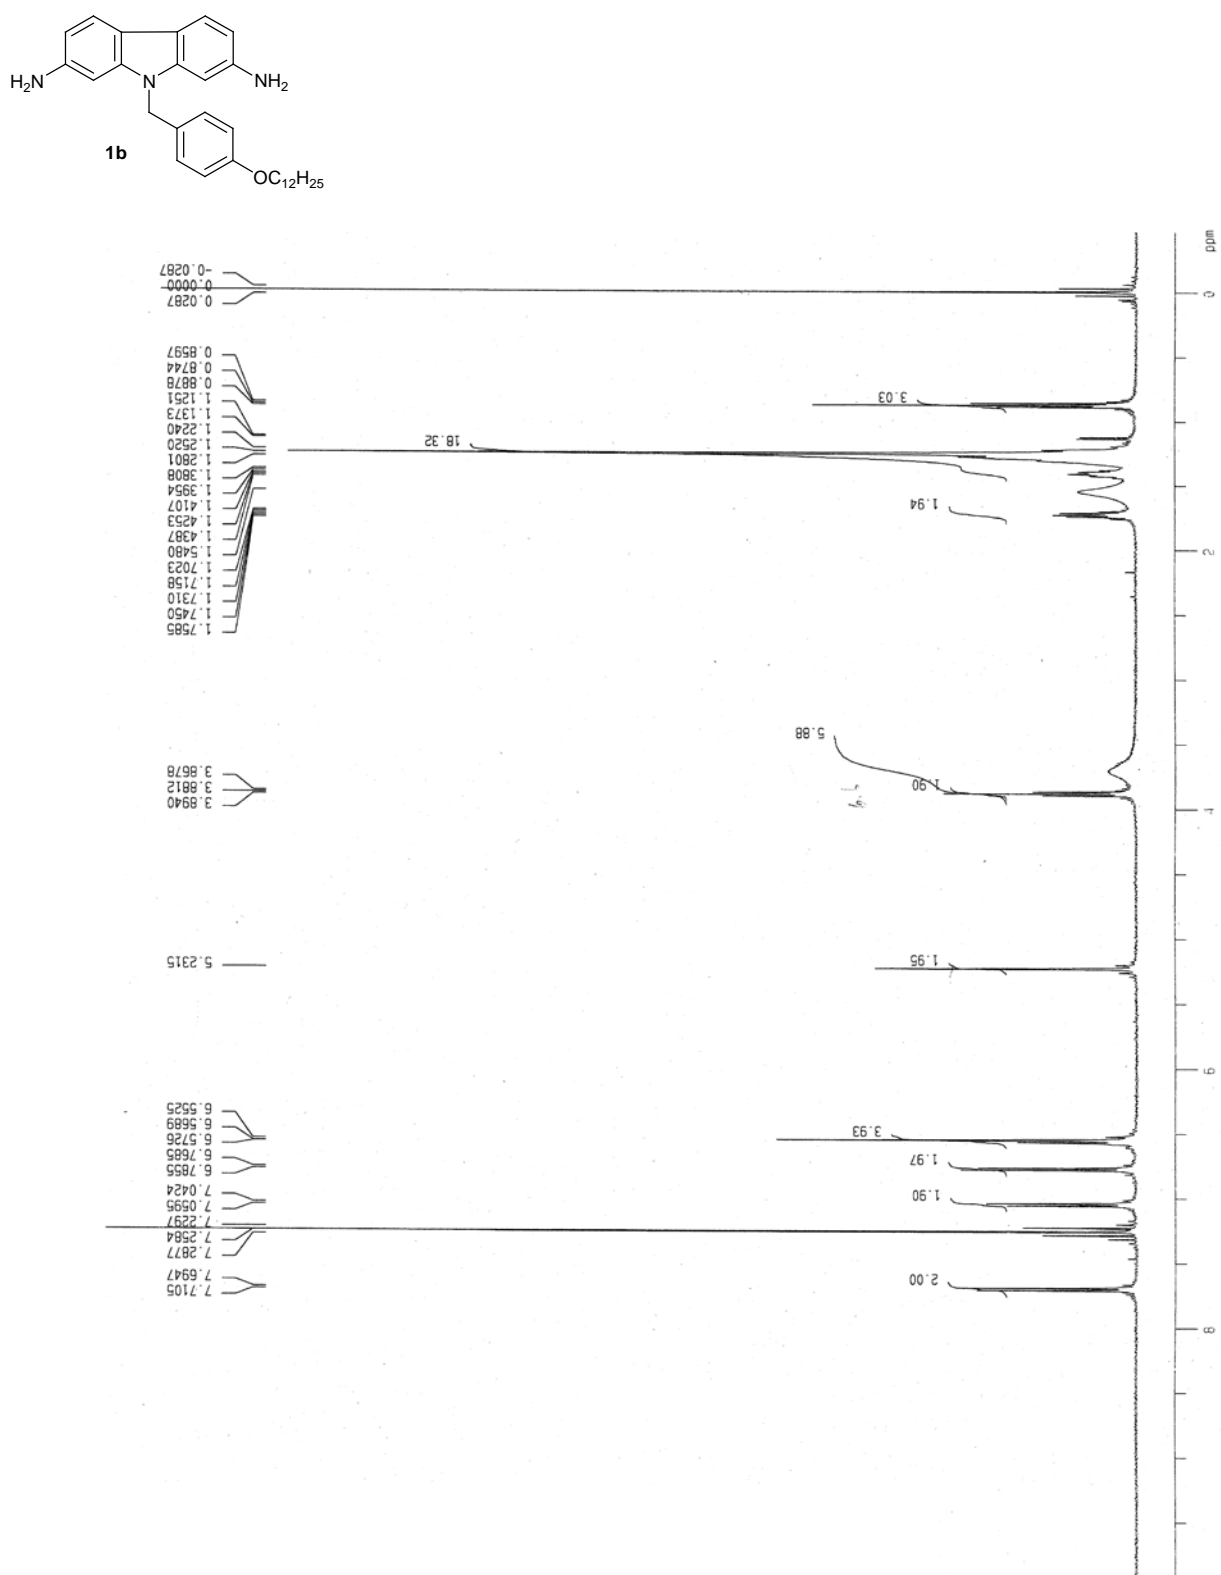

**Fig. S13a.** <sup>1</sup>H NMR spectrum (500 MHz, CDCl<sub>3</sub>) of the carbazole **2b**.

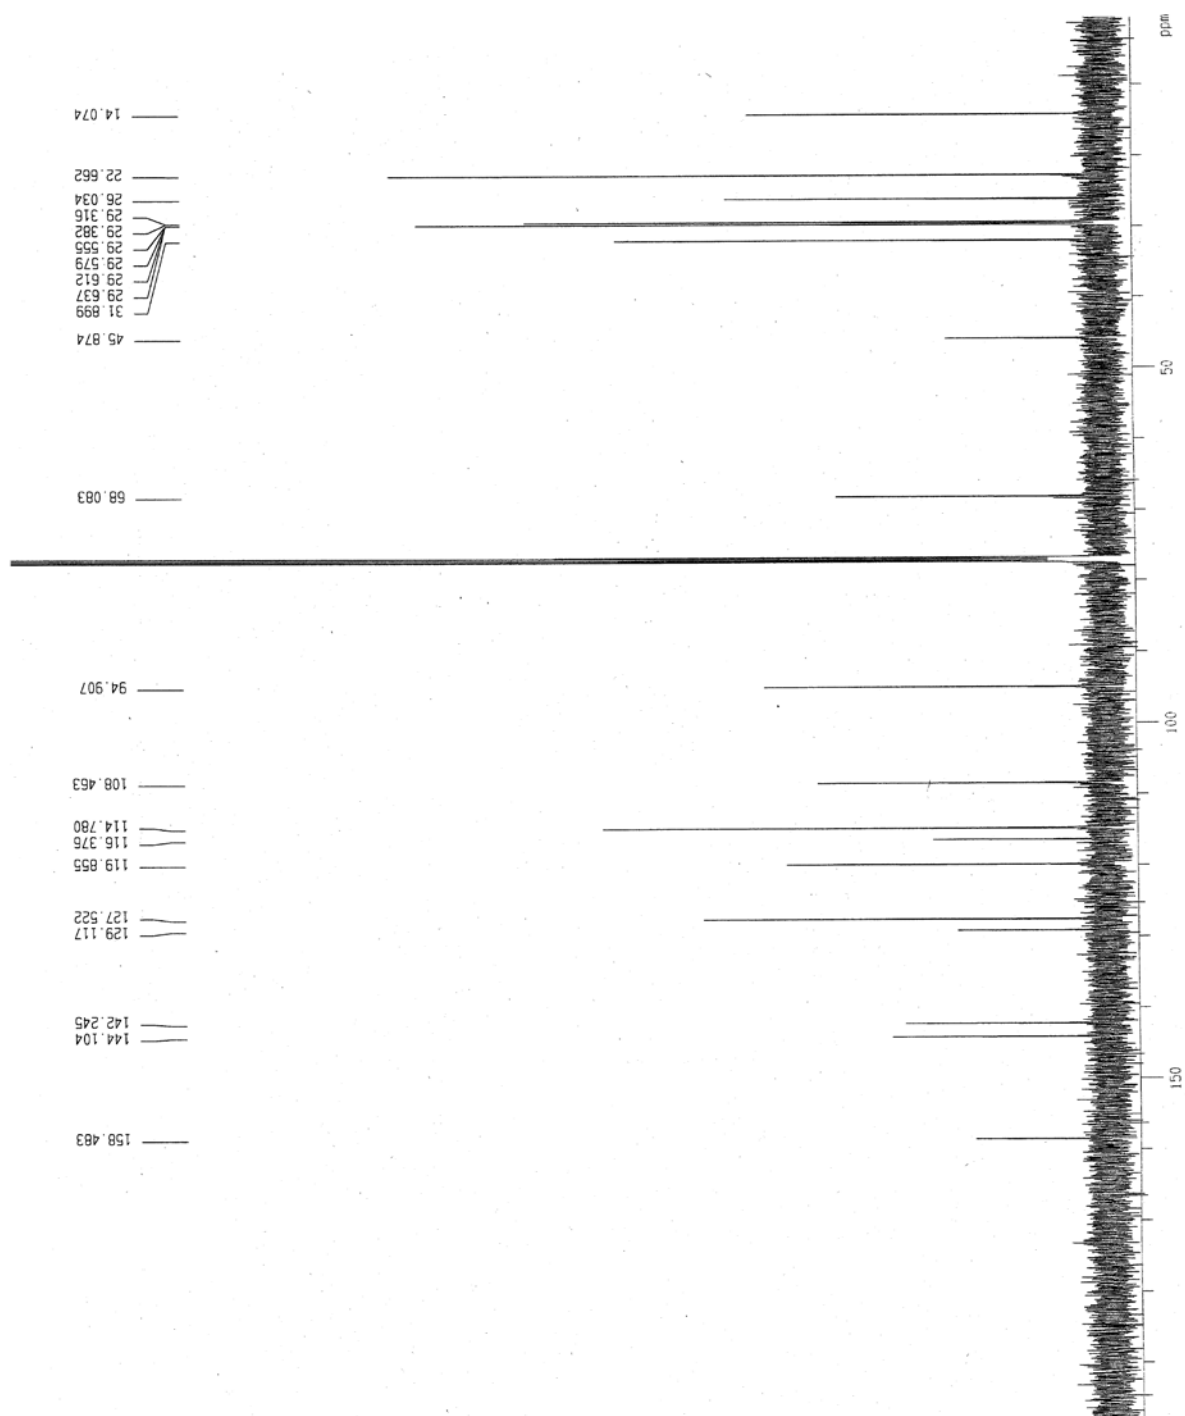

**Fig. S13b.** <sup>13</sup>C NMR spectrum (500 MHz, CDCl<sub>3</sub>) of the carbazole **2b**.
